# Supplementary material
Source: PubMed Central journal article supplement (PMC3911208)
Supplement: AEM.03277-13_zam999105096so1.pdf [file AEM.03277-13_zam999105096so1.pdf]

1 Potential role of nitrite for abiotic Fe(II) oxidation and cell  
2 encrustation during nitrate reduction by denitrifying bacteria

3  
4  
5 *Nicole Klueglein<sup>1</sup>, Fabian Zeitvogel<sup>2</sup>, York-Dieter Stierhof<sup>3</sup>, Matthias Floetenmeyer<sup>4</sup>,*  
6 *Kurt O. Konhauser<sup>5</sup>, Andreas Kappler<sup>1\*</sup>, Martin Obst<sup>2</sup>*

7  
8 Geomicrobiology<sup>1</sup>, Environmental Analytical Microscopy<sup>2</sup>- Center for Applied Geosciences  
9 University of Tuebingen, Germany; Center for Plant Molecular Biology<sup>3</sup> - University of  
10 Tuebingen, Germany; Max Planck Institute for Developmental Biology<sup>4</sup>, Tuebingen,  
11 Germany; Department of Earth and Atmospheric Sciences, University of Alberta, Canada<sup>5</sup>

12  
13 \*To whom correspondence should be sent:

14 Andreas Kappler, Geomicrobiology, Center for Applied Geosciences  
15 University of Tuebingen, Sigwartstrasse 10, D-72076 Tuebingen, Germany  
16 Phone: +49-7071-2974992, Fax: +49-7071-29-295059  
17 Email: andreas.kappler@uni-tuebingen.de

18  
19  
20  
21 **SUPPLEMENTAL INFORMATION**  
22  
23

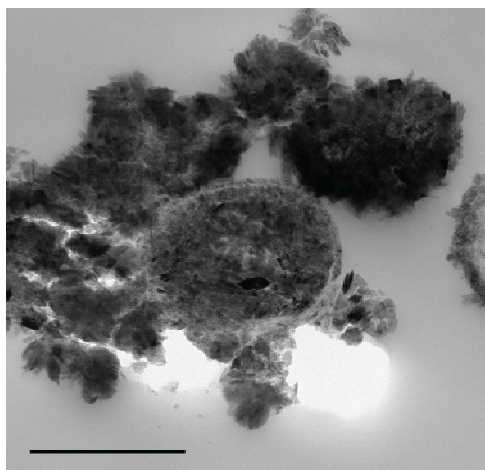

24

25 Figure S1: Resin section (TEM images) of cryofixed and freeze-substituted *Acidovorax* strain BoFeN1  
26 grown in the presence of 10 mM nitrate, 5 mM acetate and ~8 mM Fe(II). Cells are not stained. Scale  
27 bar is 500 nm.

28

29

30

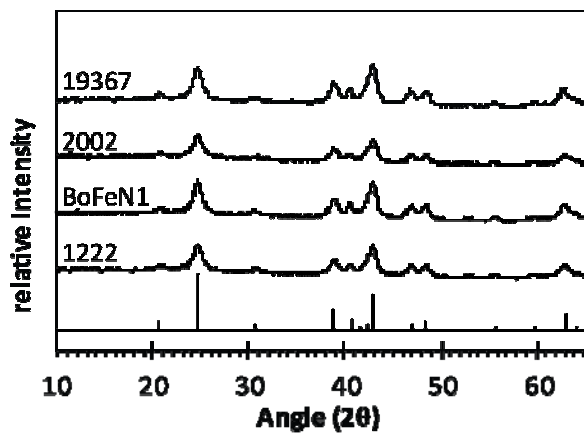

31

32

33 Figure S2: X-ray diffractogram of the mineral products formed within 11 days in the presence of  
34 ~8 mM Fe(II), 10 mM nitrate and 5 mM acetate by *Paracoccus denitrificans* ATCC 19367,  
35 *Pseudogulbenkiania* strain 2002, *Acidovorax* strain BoFeN1, and *Paracoccus denitrificans* Pd 1222.  
36 For comparison the specific reflections of goethite are shown at the bottom.

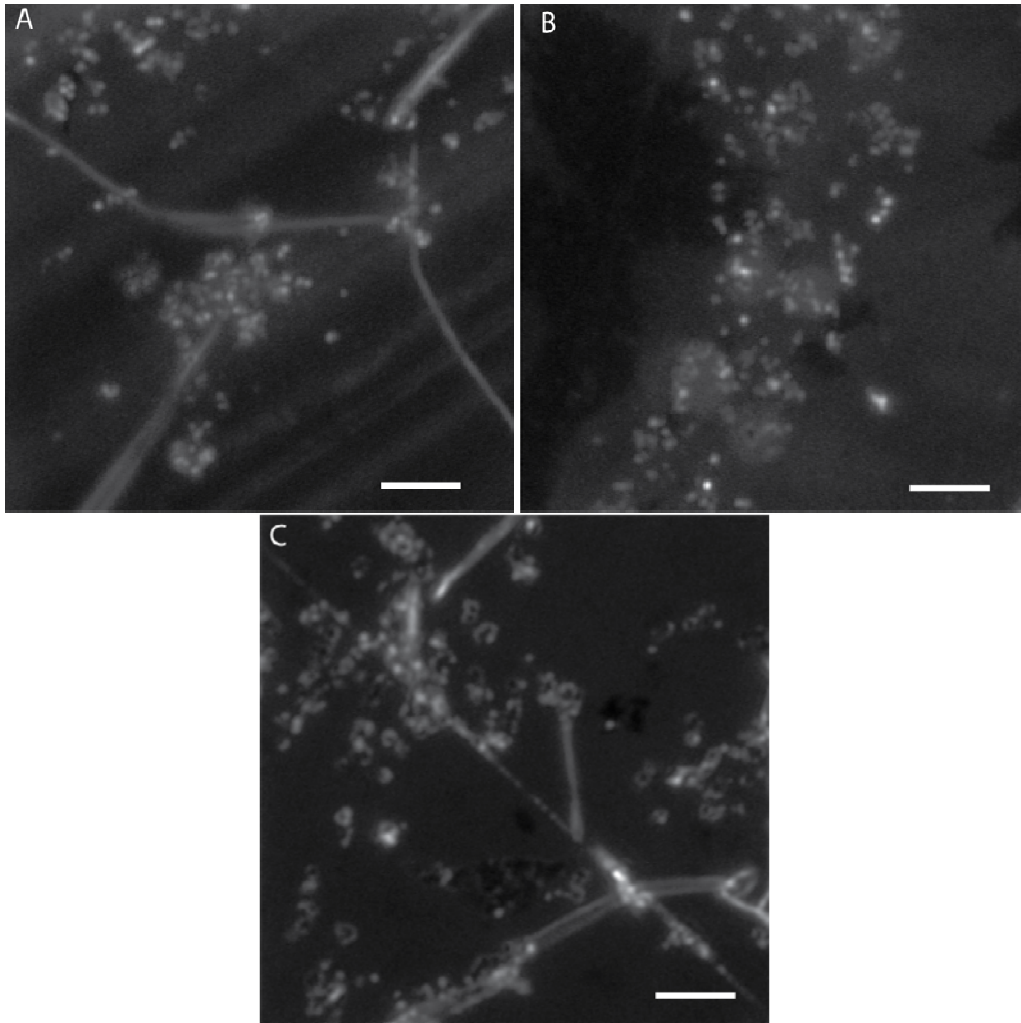

37 .

38 Figure S3: Fluorescence image of (A) *Acidovorax* strain BoFeN1, (B) *Pseudogulbenkiania* strain 2002  
39 and (C) *Paracoccus denitrificans* ATCC 19367 grown in the presence of Fe(II). EPS in resin-sections  
40 was stained with WGA-Alexa Fluor® 633 conjugate directly on TEM grids. Bright color indicates the  
41 fluorescing EPS-shells. Scale bar is 10  $\mu$ m.

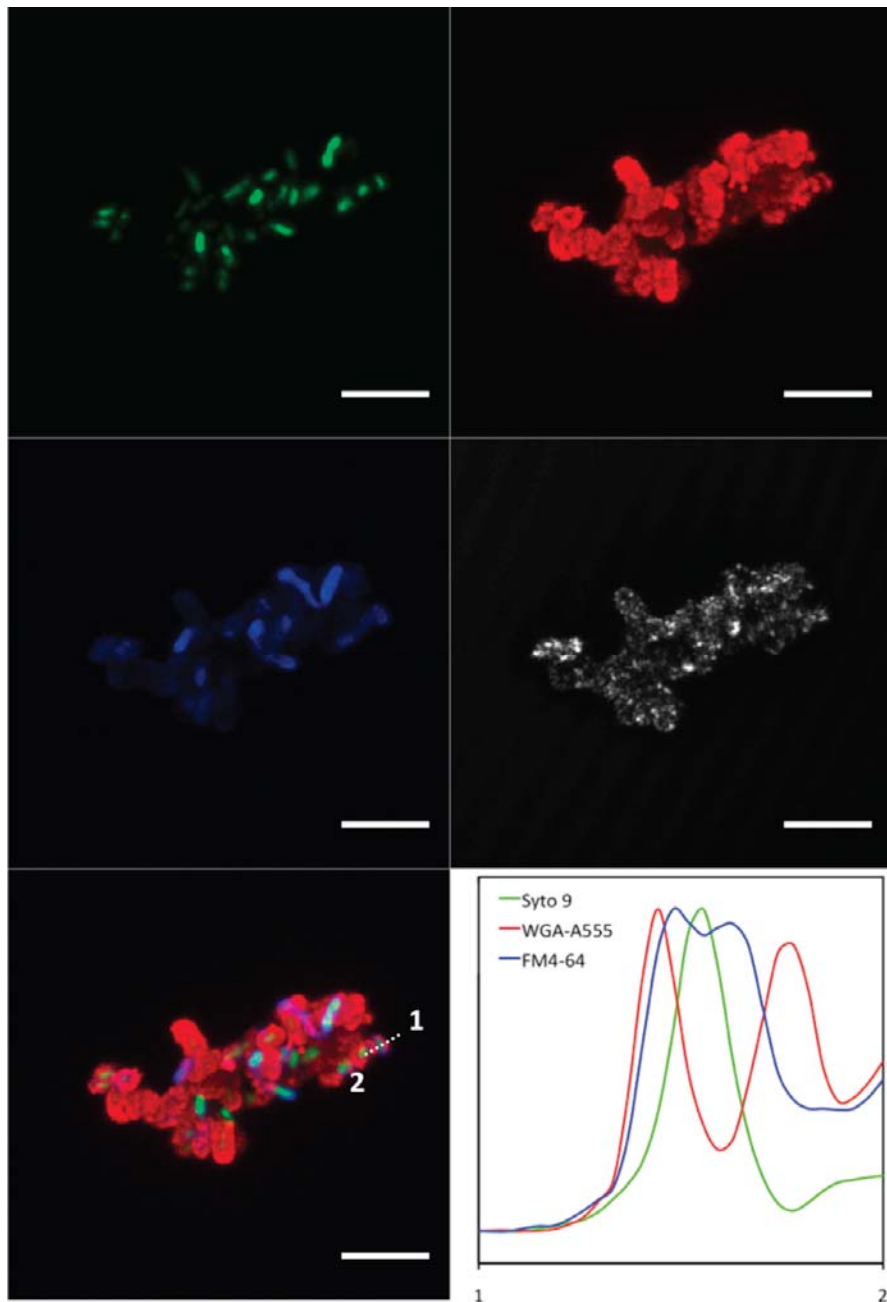

42

43 Figure S4: CLSM images of *Acidovorax* strain BoFeN1 incubated for seven days with 10 mM nitrate,  
 44 5 mM acetate and ~8 mM Fe(II). DNA was stained with Syto9 (green), EPS with WGA-Alexa Fluor®  
 45 555 conjugate (red), lipids with FM4-64 (blue), white is showing the reflection of minerals. The left  
 46 panel in the bottom row shows the RGB-overlay of the first three channels. The right panel at the  
 47 bottom shows a cross-section through one cell (marked by 1-2). Scale bars are 5 µm. Profile show  
 48 relative intensities.

49

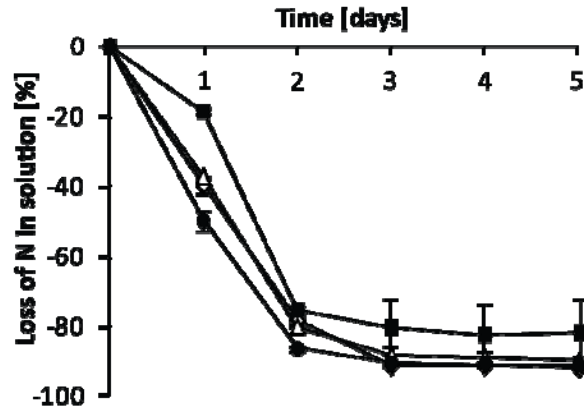

50

51 Figure S5: Loss of nitrogen from solution over time given in % and calculated by subtraction of  
52 measured nitrate and nitrite concentrations from the initial nitrate concentration. *Acidovorax* strain  
53 BoFeN1 (●), *Pseudogulbenkiania* strain 2002 (■), *Paracoccus denitrificans* ATCC 19367 (◇), and  
54 *Paracoccus denitrificans* 1222 (△).

55

56

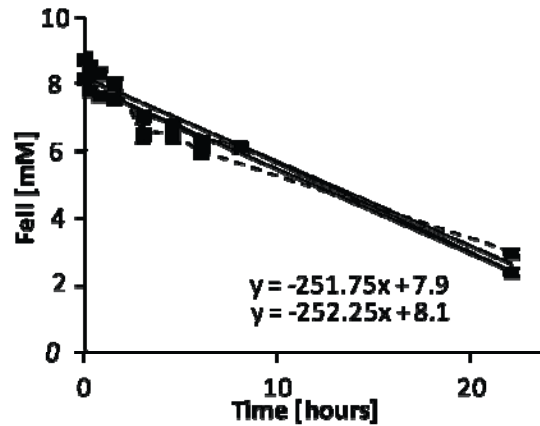

57

58 Figure S6: Fe(II) oxidation over time at 40°C in media containing cells of *Acidovorax* strain BoFeN1  
59 (solid line) or sterile filtered media (dashed line). All cultures contained ~ 4 mM accumulated nitrite.  
60 The equations of the trend lines are given.

61

62 **Supplemental information 1: Preparation of samples for the transmission electron microscopy**  
63 **image shown in figure 6 B.**

64 Biofilms were collected off granitic bedrock in the tunnel at 432 m underground at the Äspö Hard  
65 Rock Laboratory near Oskarshamn, Sweden. Iron oxide precipitates develop directly on the granite at  
66 locations where neutral to slightly alkaline (pH 7.0-8.0) groundwater enters the tunnel through  
67 hydraulically conductive fracture zones (see Ferris et al., 1999 for details). The sample was recovered  
68 off the hard substrata with sterile scalpels and immediately placed in 5 mL metal-free plastic tubes  
69 containing aqueous 2.0% (vol/vol) glutaraldehyde. The biofilm samples were prepared for thin-  
70 sectioning by washing in a solution of 0.05 M N-2-hydroxyethylpiperazine-N'-2-ethane-sulfonic acid  
71 (HEPES) buffer (Research Organics Inc., Cleveland), pH 7.2, to remove excess glutaraldehyde. After  
72 washing, the samples were dehydrated through a graded acetone series and embedded in epoxy resin  
73 (Epon 812, CanEM, Guelph), as previously described by Graham and Beveridge (1990). Thin  
74 sections, approximately 60 nm in thickness, were obtained with a Reichert-Jung Ultracut E  
75 ultramicrotome, and mounted on Formvar and carbon-coated 200-mesh copper grids. To increase the  
76 electron contrast of cytoplasmic material inside intact cells, some thin sections were stained with 1%  
77 uranyl acetate before imaging in the electron microscope. Grids were viewed with a Philips EM400  
78 Transmission electron microscope. The TEM was operated at 100 keV, with a liquid nitrogen-cooled  
79 anticontamination device in place.

80 **References**

81 Ferris, F.G., Konhauser, K.O., Lyvén, B., and Pedersen, K., 1999. Accumulation of metals by  
82 bacteriogenic iron oxides in a subterranean environment. *Geomicrobiology Journal*, 16:181-192.

83 Graham, L.L., and T.J. Beveridge. 1990. Evaluation of freeze-substitution and conventional  
84 embedding protocols for routine electron microscope processing of eubacteria. *J. Bacteriol.*, 172:2141-  
85 2149.

86
